# Supplementary material
Source: PubMed Central journal article supplement (PMC3591884)
Supplement: AAC.01900-12_zac999101639so3.pdf [file AAC.01900-12_zac999101639so3.pdf]

1 **SUPPLEMENTARY TABLE 1.** Influence of VRC treatment on *Cyp* mRNA levels in livers of wild-type, *Pxr*-null, and *Car*-null  
 2 mice.

|                | Wild-type |                |      | <i>Pxr</i> -null |               |      | <i>Car</i> -null |              |      |
|----------------|-----------|----------------|------|------------------|---------------|------|------------------|--------------|------|
|                | Vehicle   | VRC            | Fold | Vehicle          | VRC           | Fold | Vehicle          | VRC          | Fold |
| <i>Cyp1a2</i>  | 1.0 ± 0.1 | 1.3 ± 0.3      | 1.3  | 0.8 ± 0.1        | 1.3 ± 0.4*    | 1.6  | 0.8 ± 0.1        | 1.2 ± 0.2**  | 1.5  |
| <i>Cyp2b10</i> | 1.0 ± 0.8 | 61.4 ± 15.0*** | 61.4 | 1.2 ± 0.9        | 75.6 ± 9.8*** | 61.9 | 0.1 ± 0.1        | 1.5 ± 0.5**  | 16.5 |
| <i>Cyp2c29</i> | 1.0 ± 0.1 | 4.5 ± 0.9***   | 4.5  | 3.3 ± 0.6        | 7.6 ± 1.2***  | 2.3  | 0.1 ± 0.0        | 2.5 ± 0.7*** | 28.4 |
| <i>Cyp2c37</i> | 1.0 ± 0.2 | 2.4 ± 0.7**    | 2.4  | 0.8 ± 0.1        | 3.3 ± 0.4***  | 4.0  | 0.3 ± 0.1        | 0.6 ± 0.1*** | 2.2  |
| <i>Cyp2c55</i> | 1.0 ± 0.1 | 29.4 ± 2.5***  | 29.4 | 6.7 ± 0.6        | 36.9 ± 2.6*** | 5.5  | 0.4 ± 0.2        | 7.8 ± 2.9**  | 17.7 |
| <i>Cyp3a11</i> | 1.0 ± 0.2 | 10.6 ± 5.3*    | 10.6 | 1.1 ± 0.2        | 10.1 ± 5.2*   | 9.0  | 1.1 ± 0.3        | 9.8 ± 5.4*   | 9.3  |

3  
 4 VRC was orally administered to wild-type, *Pxr*-null, and *Car*-null mice at 30 mg/kg for 7 days. Hepatic *Cyp* mRNA levels were  
 5 determined by real-time PCR, and normalized with those of *β-actin*. Relative mRNA levels are shown as the mean ± SD (n=4). Fold  
 6 induction (Fold) by VRC treatment are calculated by dividing mRNA levels in VRC-treated mice with those in vehicle-treated mice.  
 7 \*: P < 0.05, \*\*: P < 0.01, \*\*\*: P < 0.001, compared to strain-matched and vehicle-treated mice.

8 **SUPPLEMENTARY TABLE 2.** Influence of VRC treatment on *Cyp* mRNA levels in livers of wild-type and *Pxr/Car*-null mice.

|                | Wild-type |                 |       | <i>Pxr/Car</i> -null |            |      |
|----------------|-----------|-----------------|-------|----------------------|------------|------|
|                | Vehicle   | VRC             | Fold  | Vehicle              | VRC        | Fold |
| <i>Cyp1a2</i>  | 1.0 ± 0.1 | 1.9 ± 0.2***    | 1.9   | 1.3 ± 0.2            | 1.5 ± 0.2  | 1.1  |
| <i>Cyp2b10</i> | 1.0 ± 0.7 | 204.4 ± 25.2*** | 204.4 | 0.9 ± 1.1            | 0.5 ± 0.5  | 0.6  |
| <i>Cyp2c29</i> | 1.0 ± 0.2 | 3.8 ± 0.4***    | 3.8   | 2.7 ± 0.6            | 3.0 ± 1.2  | 1.1  |
| <i>Cyp2c37</i> | 1.0 ± 0.1 | 3.3 ± 0.5***    | 3.3   | 0.8 ± 0.2            | 1.1 ± 0.8  | 1.4  |
| <i>Cyp2c55</i> | 1.0 ± 0.4 | 13.3 ± 2.2***   | 13.3  | 6.3 ± 0.8            | 4.9 ± 0.3* | 0.8  |
| <i>Cyp3a11</i> | 1.0 ± 0.2 | 6.3 ± 0.9***    | 6.3   | 1.4 ± 0.2            | 1.7 ± 0.6  | 1.2  |

9

10 VRC was orally administered to wild-type and *Pxr/Car*-null mice at 30 mg/kg for 7 days. Hepatic *Cyp* mRNA levels were  
 11 determined by real-time PCR, and normalized with those of *β-actin*. Relative mRNA levels are shown as mean ± SD (n=4). Fold  
 12 induction (Fold) by VRC treatment are calculated by dividing mRNA levels in VRC-treated mice with those in vehicle-treated mice.

13 \*: P < 0.05, \*\*\*: P < 0.001, compared to strain-matched and vehicle-treated mice.

14 **SUPPLEMENTARY TABLE 3.** Influence of VRC treatment on *Fmo* mRNA levels in livers of wild-type and *Pxr/Car*-null mice

|             | Wild-type |              |      | <i>Pxr/Car</i> -null |           |      |
|-------------|-----------|--------------|------|----------------------|-----------|------|
|             | Vehicle   | VRC          | Fold | Vehicle              | VRC       | Fold |
| <i>Fmo1</i> | 1.0 ± 0.1 | 1.3 ± 0.1**  | 1.3  | 1.8 ± 0.6            | 1.7 ± 0.6 | 0.9  |
| <i>Fmo2</i> | 1.0 ± 0.3 | 1.3 ± 0.4    | 1.3  | 2.2 ± 1.4            | 2.8 ± 2.7 | 1.3  |
| <i>Fmo3</i> | 1.0 ± 1.7 | 0.7 ± 0.6    | 0.7  | 1.0 ± 1.3            | 0.2 ± 0.2 | 0.2  |
| <i>Fmo5</i> | 1.0 ± 0.1 | 1.6 ± 0.2*** | 1.6  | 1.4 ± 0.2            | 1.6 ± 0.3 | 1.2  |

15

16 VRC was orally administered to wild-type and *Pxr/Car*-null mice at 30 mg/kg for 7 days. Hepatic *Fmo* mRNA levels were  
 17 determined by real-time PCR, and normalized with those of *β-actin*. Relative mRNA levels are shown as mean ± SD (n=4). Fold  
 18 induction (Fold) by VRC treatment are calculated by dividing mRNA levels in VRC-treated mice with those in vehicle-treated mice. \*\*:   
 19 P < 0.01, \*\*\*: P < 0.001, compared to strain-matched and vehicle-treated mice.
